# Supplementary material
Source: PubMed Central journal article supplement (PMC9270464)
Supplement: 41467_2022_31721_MOESM1_ESM.pdf [file 41467_2022_31721_MOESM1_ESM.pdf]

# Supplementary Information

## **A third vaccination with a single T cell epitope confers protection in a murine model of SARS-CoV-2 infection**

Iris N. Pardieck<sup>1</sup>, Tetje C. van der Sluis<sup>1\*</sup>, Esmé T.I. van der Gracht<sup>1\*</sup>, Dominique M.B. Veerkamp<sup>1</sup>, Felix M. Behr<sup>1</sup>, Suzanne van Duikeren<sup>1</sup>, Guillaume Beyrend<sup>1</sup>, Jasper Rip<sup>1</sup>, Reza Nadafi<sup>1</sup>, Elham Beyranvand Nejad<sup>1</sup>, Nils Mülling<sup>1</sup>, Dena J. Brasem<sup>1</sup>, Marcel G.M. Camps<sup>1</sup>, Sebenzile K. Myeni<sup>2</sup>, Peter J. Bredenbeek<sup>2</sup>, Marjolein Kikkert<sup>2</sup>, Yeonsu Kim<sup>3</sup>, Luka Cicin-Sain<sup>3</sup>, Tamim Abdelaal<sup>4,5</sup>, Klaas P.J.M. van Gisbergen<sup>6</sup>, Kees L.M.C. Franken<sup>1</sup>, Jan Wouter Drijfhout<sup>1</sup>, Cornelis J.M. Melief<sup>7</sup>, Gerben C.M. Zondag<sup>8</sup>, Ferry Ossendorp<sup>1</sup>, Ramon Arens<sup>1</sup>

### **Contents:**

Supplementary Figure 1,2,3,4, 5

Supplementary Table 1,2, 3

Supplementary Methods

Supplementary References

# Supplementary Figure 1

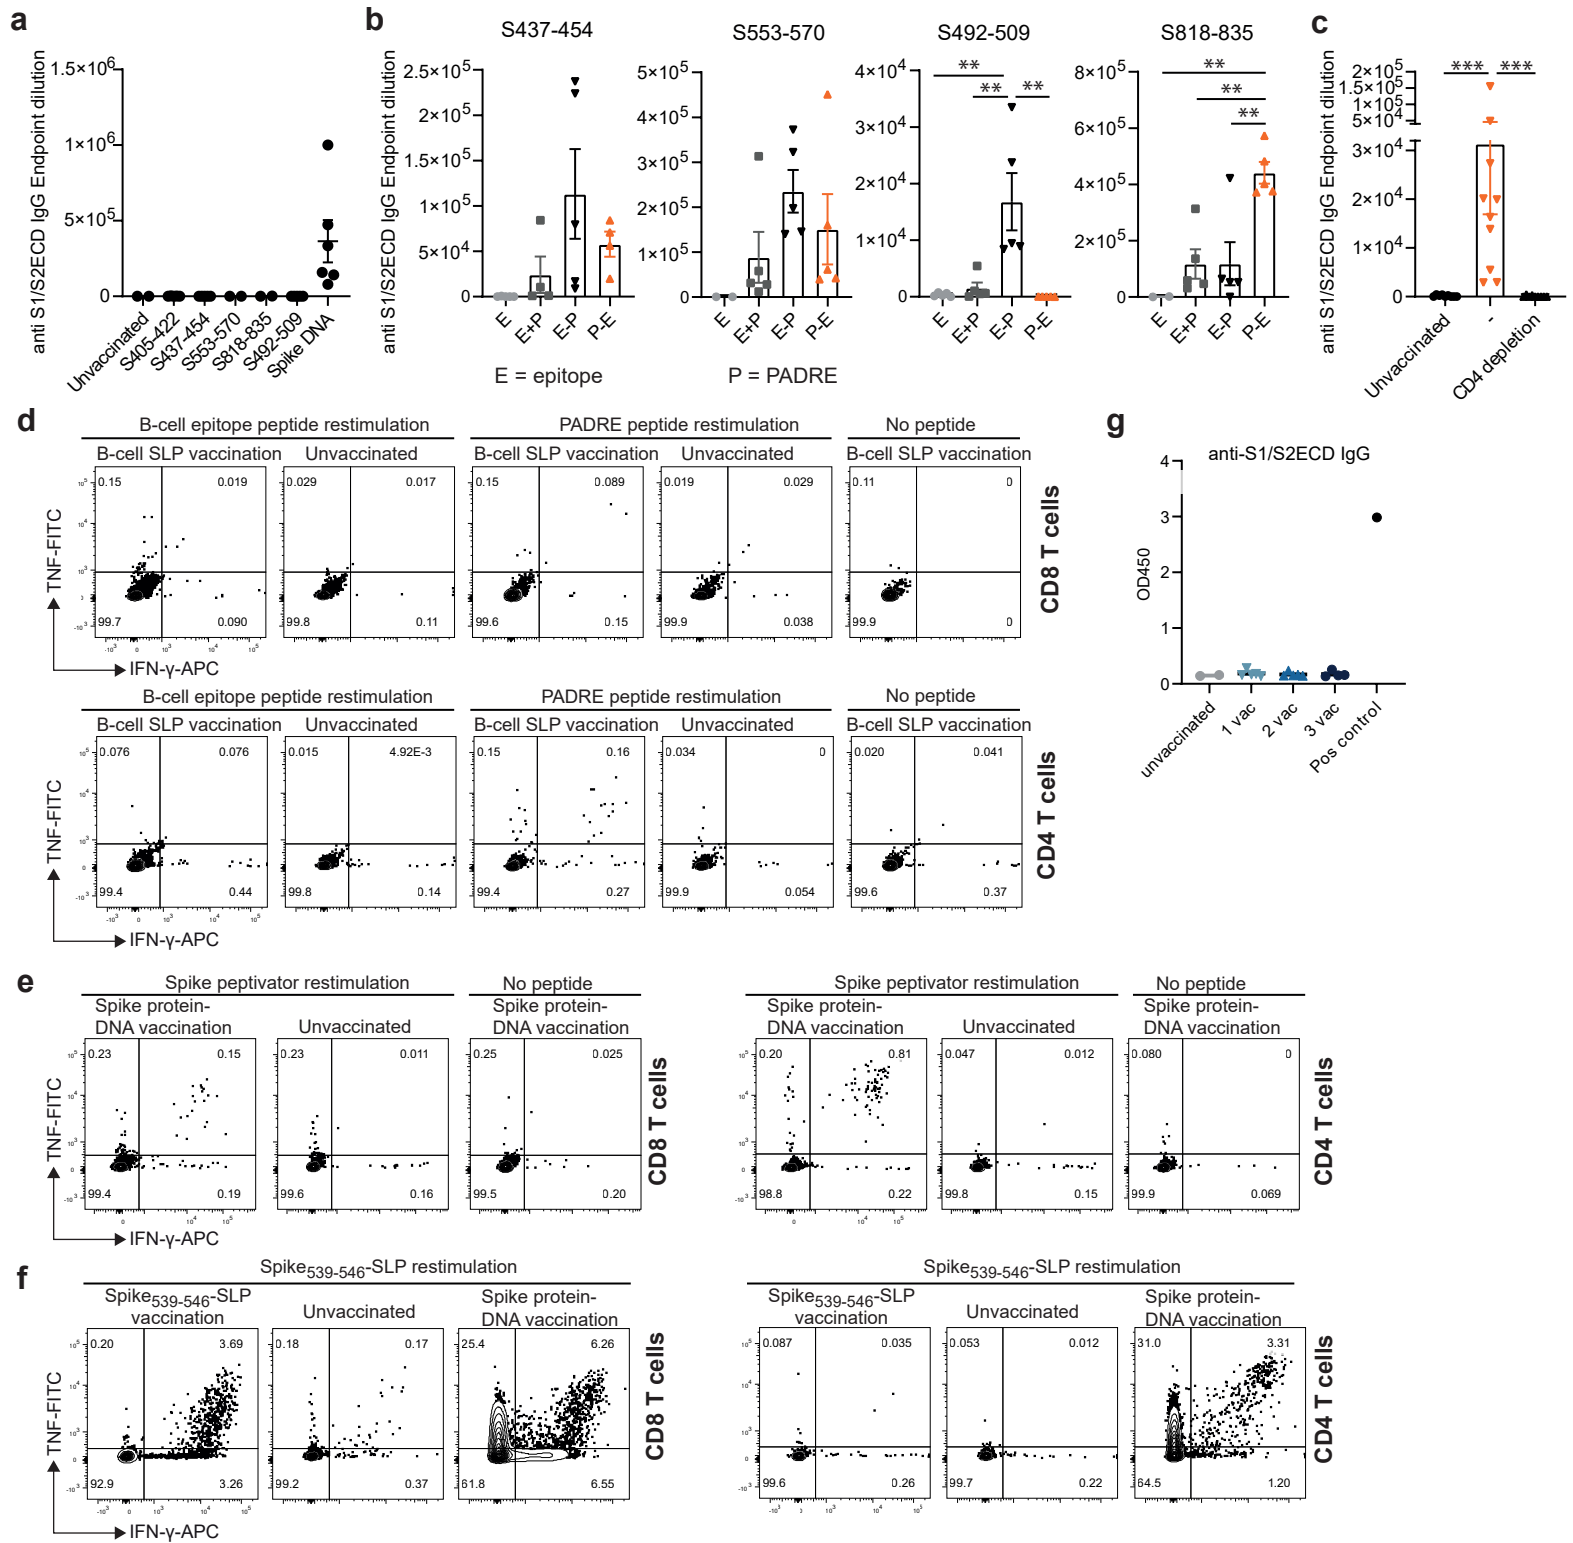

**Supplementary Figure 1. Synthetic long peptide (SLP)-based vaccines containing a single B cell epitope require adjuvants to elicit antibodies.** (a) C57BL/6 mice were subcutaneously vaccinated on day 0, day 14 and day 28 with SLPs containing linear B cell epitopes adjuvanted with CpG and Inactivated Freund's Adjuvant (IFA). Spike-specific IgG in blood was determined at day 42 after vaccination. Serum from a Spike protein-encoding DNA vaccinated animal was used as a positive control. Results are depicted as the endpoint dilution. Data represented as mean  $\pm$  SEM. S553-570, S818-835: n=2; S405-422, S437-454, S492-509: n=5; Spike DNA: n=6. (b) C57BL/6 mice were vaccinated as described in (a) with SLPs consisting of the B-cell epitope alone (E), the B cell epitope combined with the PADRE peptide (E+P) or C-terminal and N-Terminal PADRE-coupled linear B cell epitopes (E-P, P-E). Spike-specific IgG in blood at day 42 after vaccination. Results are depicted as the endpoint dilution. Data represented as mean  $\pm$  SEM. Symbols represent individual mice. S437-454: E, E-P: n=5; E+P, P-E: n=4. S553-570: E, n=2, other n=5. S492-509: n=5. S818-835: E, n=2, other n=5.  $**P=0.006-0.0059$ . One-way ANOVA with Tukey's multiple comparisons test was performed to determine statistical significance. (c) Spike-specific IgG antibodies in blood at day 27 in unvaccinated mice and in CD4<sup>+</sup> T cell depleted and proficient mice that were vaccinated with SLPs consisting of PADRE-coupled linear B cell epitopes adjuvanted with CpG and IFA. Results are depicted as the endpoint dilution. Data is represented as mean  $\pm$  SEM (n=10).  $***P=0.001-0.008$ . Kruskal-Wallis test with multiple comparisons was performed to determine significance. (d) Intracellular cytokine production (IFN- $\gamma$  and TNF) of CD8<sup>+</sup> and CD4<sup>+</sup> T cells in the spleen at day 35 after PADRE-coupled linear B cell epitope SLP vaccination adjuvanted with CpG and IFA. Splenocytes were restimulated with the SLPs containing linear B cell epitopes coupled to PADRE, the PADRE peptide alone or no peptide. (e) Intracellular cytokine production (IFN- $\gamma$  and TNF) of splenic CD8<sup>+</sup> and CD4<sup>+</sup> T cells at day 70 after Spike protein DNA vaccination. Splenocytes were restimulated with the S1 peptivator mix or no peptide. (f) Intracellular cytokine production of splenic CD8<sup>+</sup> and CD4<sup>+</sup> T cells at day 35 after Spike<sub>539-546</sub> SLP vaccination or Spike protein DNA vaccination and re-stimulated with Spike<sub>539-546</sub>-SLP. (g) OD450 values of Spike-specific IgG in blood at day 42 after either 1, 2 or 3 times vaccination with the Spike<sub>539-546</sub>-SLP. Serum from a Spike-encoding DNA vaccinated animal was used as a positive control. Data represented as mean  $\pm$  SEM (n=5). Symbols represent individual mice. Source data are provided as Source Data file.

**Supplementary Figure 2**

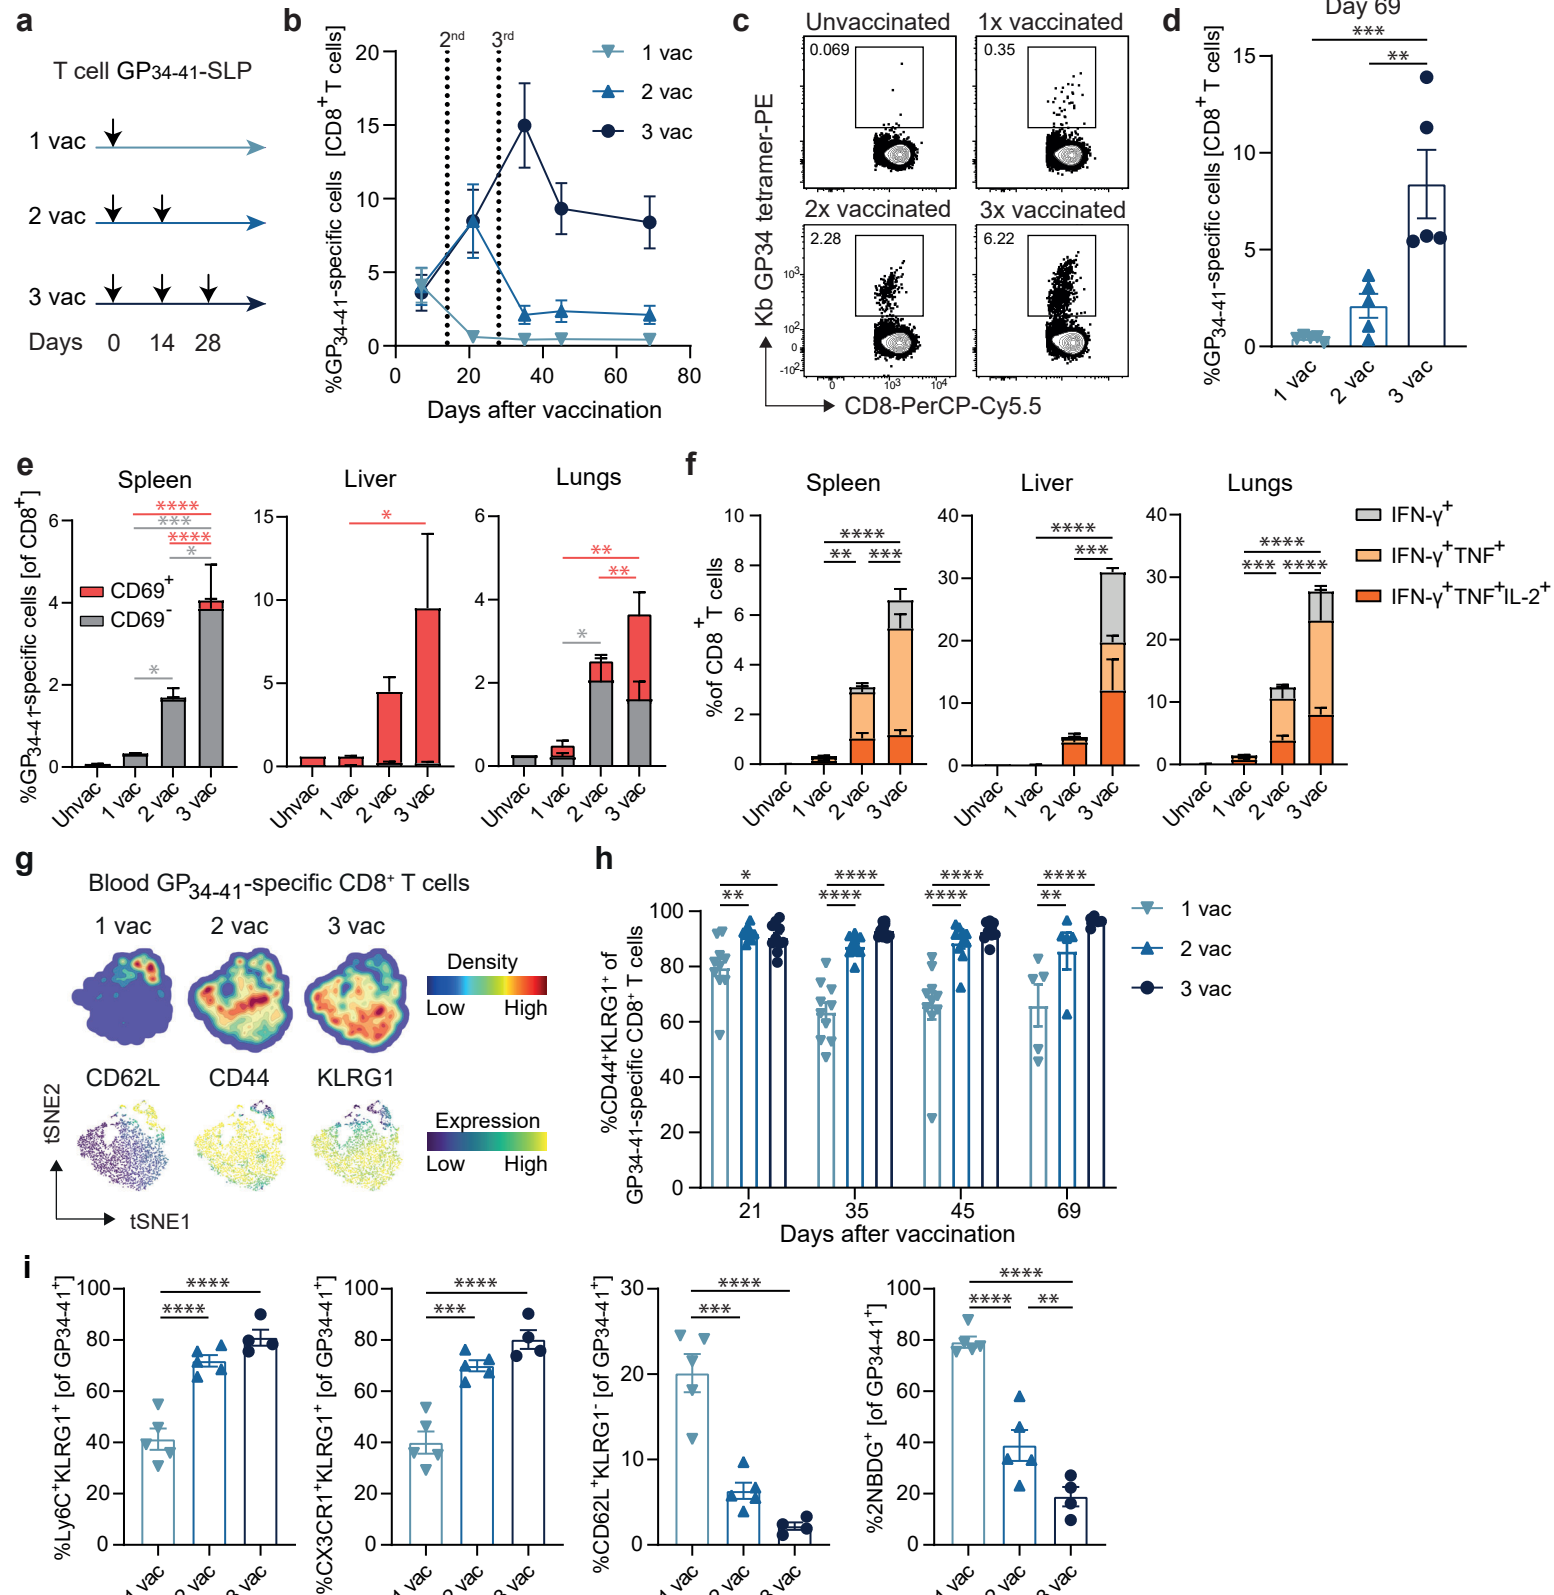

**Supplementary Figure 2. A third vaccination with a single T cell epitope augments effector-memory and tissue-resident memory CD8<sup>+</sup> T cell formation.** (a) C57BL/6 mice were vaccinated with the GP34-41-SLP vaccine adjuvanted with CpG in a prime-boost-boost regimen with 2 week intervals. (b) GP34-41-specific CD8<sup>+</sup> T cell kinetics in blood at indicated days after vaccination. Data represented as mean  $\pm$  SEM (n=5 per group). (c) Representative flow cytometry plots of GP34-41-specific CD8<sup>+</sup> T cells determined by MHC class I tetramer staining. (d) GP34-41-specific CD8<sup>+</sup> T cells in blood at day 69 after vaccination. Data represented as mean  $\pm$  SEM (n=5 per group). Symbols represent individual mice. \*\*P=0.0038, \*\*\*P=0.0006. (e) Frequencies of CD69<sup>+</sup> and CD69<sup>-</sup> GP34-41-specific CD8<sup>+</sup> T cells in the CD8<sup>+</sup> T cell population in the spleen, liver and lungs at day 66 after 1, 2 or 3 SLP vaccinations. Data represented as mean + SEM (Spleen 1 vac, 2 vac: n=10, 3 vac: n=9; Liver/Lungs 1 vac, 2 vac: n=5, 3 vac: n=4). \*P=0.037-0.0477, \*\*P=0.0049-0.0097, \*\*\*P=0.0009, \*\*\*\*P=<0.0001. (f) Intracellular cytokine production of CD8<sup>+</sup> T cells after restimulation with the GP34-41 peptide epitope on day 66 after SLP vaccination. Data represented as mean + SEM (Spleen 1 vac, 2 vac, n=10, 3 vac, n=9; Liver/Lungs 1 vac, 2 vac: n=5, 3 vac: n=4). \*\*P=0.0043, \*\*\*P=0.003-0.005, \*\*\*\*P=<0.0001. (g) tSNE maps describing the local probability density of GP34-41-specific CD8<sup>+</sup> T cells in the blood stained for CD62L, CD44, KLRG1 at day 71 after 1, 2 and 3 vaccinations. (h) Frequencies of CD44<sup>+</sup>KLRG1<sup>+</sup> GP34-41-specific CD8<sup>+</sup> T cells in blood at indicated time points. Data represented as mean  $\pm$  SEM (Day 21, day 35 and day 45: n=10; Day 69: n=5). Symbols represent individual mice. \*P=0.0124-0.0334, \*\*P=0.0011-0.0033, \*\*\*\*P=<0.0001. (i) Cell surface marker (Ly6C<sup>+</sup>KLRG1<sup>+</sup>, CX3CR1<sup>+</sup>KLRG1<sup>+</sup> and CD62L<sup>+</sup>KLRG1<sup>+</sup>) expression and 2-NBDG uptake of splenic GP34-41-specific CD8<sup>+</sup> T cells at day 66 post SLP vaccination. Data represented as mean  $\pm$  SEM (1 vac, 2 vac: n=5; 3 vac: n=4). Symbols represent individual mice. \*\*P=0.024, \*\*\*P=0.001-0.002, \*\*\*\*P=<0.0001. One-way ANOVA with Tukey's multiple comparisons test for (d-f, h, i). Source data are provided as Source Data file.

**Supplementary Figure 3**

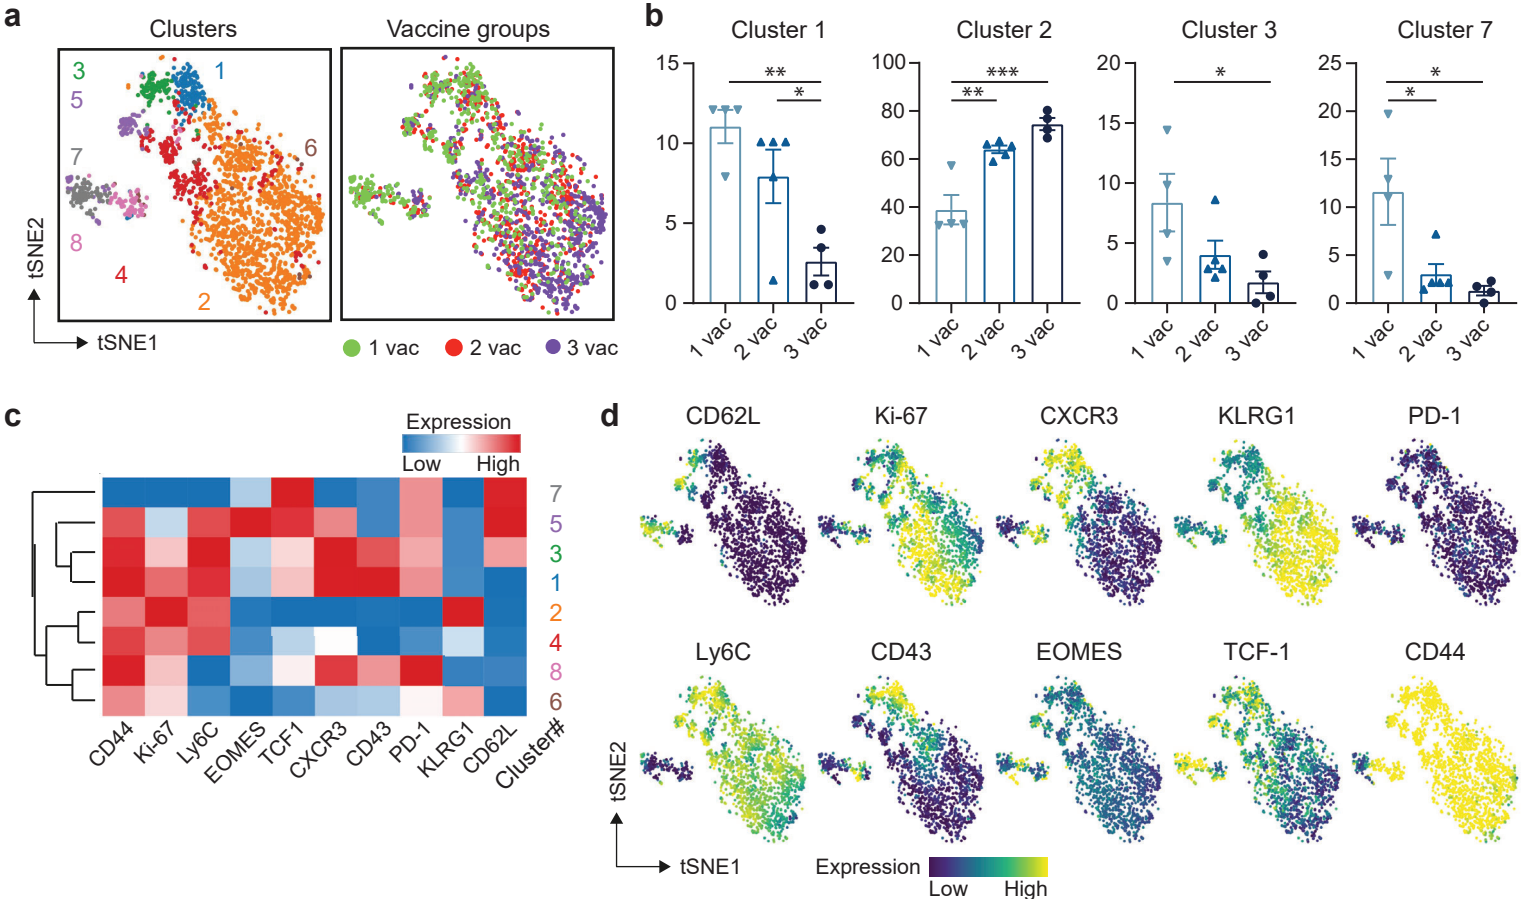

**Supplementary Figure 3. Progressive differentiation of vaccine-specific CD8+ T cells after booster vaccination.** C57BL/6 mice were vaccinated subcutaneously on day 0 (1<sup>st</sup> vaccination), day 14 (2<sup>nd</sup> vaccination) and day 28 (3<sup>rd</sup> vaccination) with the GP34-41-SLP vaccine adjuvanted with CpG. Following downsampling tSNE analysis, FlowSOM consensus metaclustering with 8 clusters analysis was performed on 695 live CD3<sup>+</sup>CD8<sup>+</sup>CD4<sup>+</sup>CD19<sup>-</sup> Spike539-546 tetramer<sup>+</sup> cells per group harvested at day 66 after SLP vaccination. Overlay of (a) the 8 FlowSOM clusters and vaccination status on the tSNE-map. (b) Significant clusters were selected and shown in bar graphs. Data represented as mean ± SEM. Symbols represent individual mice. 1 vac; 2 vac, n=5. 3 vac, n=4. \*P=0.0132-0.0428, \*\*P=0.0015-0.0043, \*\*\*P=0.0002. One-way ANOVA with Tukey's multiple comparisons test was performed to determine statistical significance. (c) Hierarchically clustered heatmap of phenotypes of the clusters shown in (A) – the indicated marker expression is shown per cluster as z-Score of median signal intensity per channel; blue, low expression; red, high expression. (d) Expression intensity of cell surface markers (color indication: blue, low expression; yellow, high expression). Source data are provided as a Source Data file.

## Supplementary Figure 4

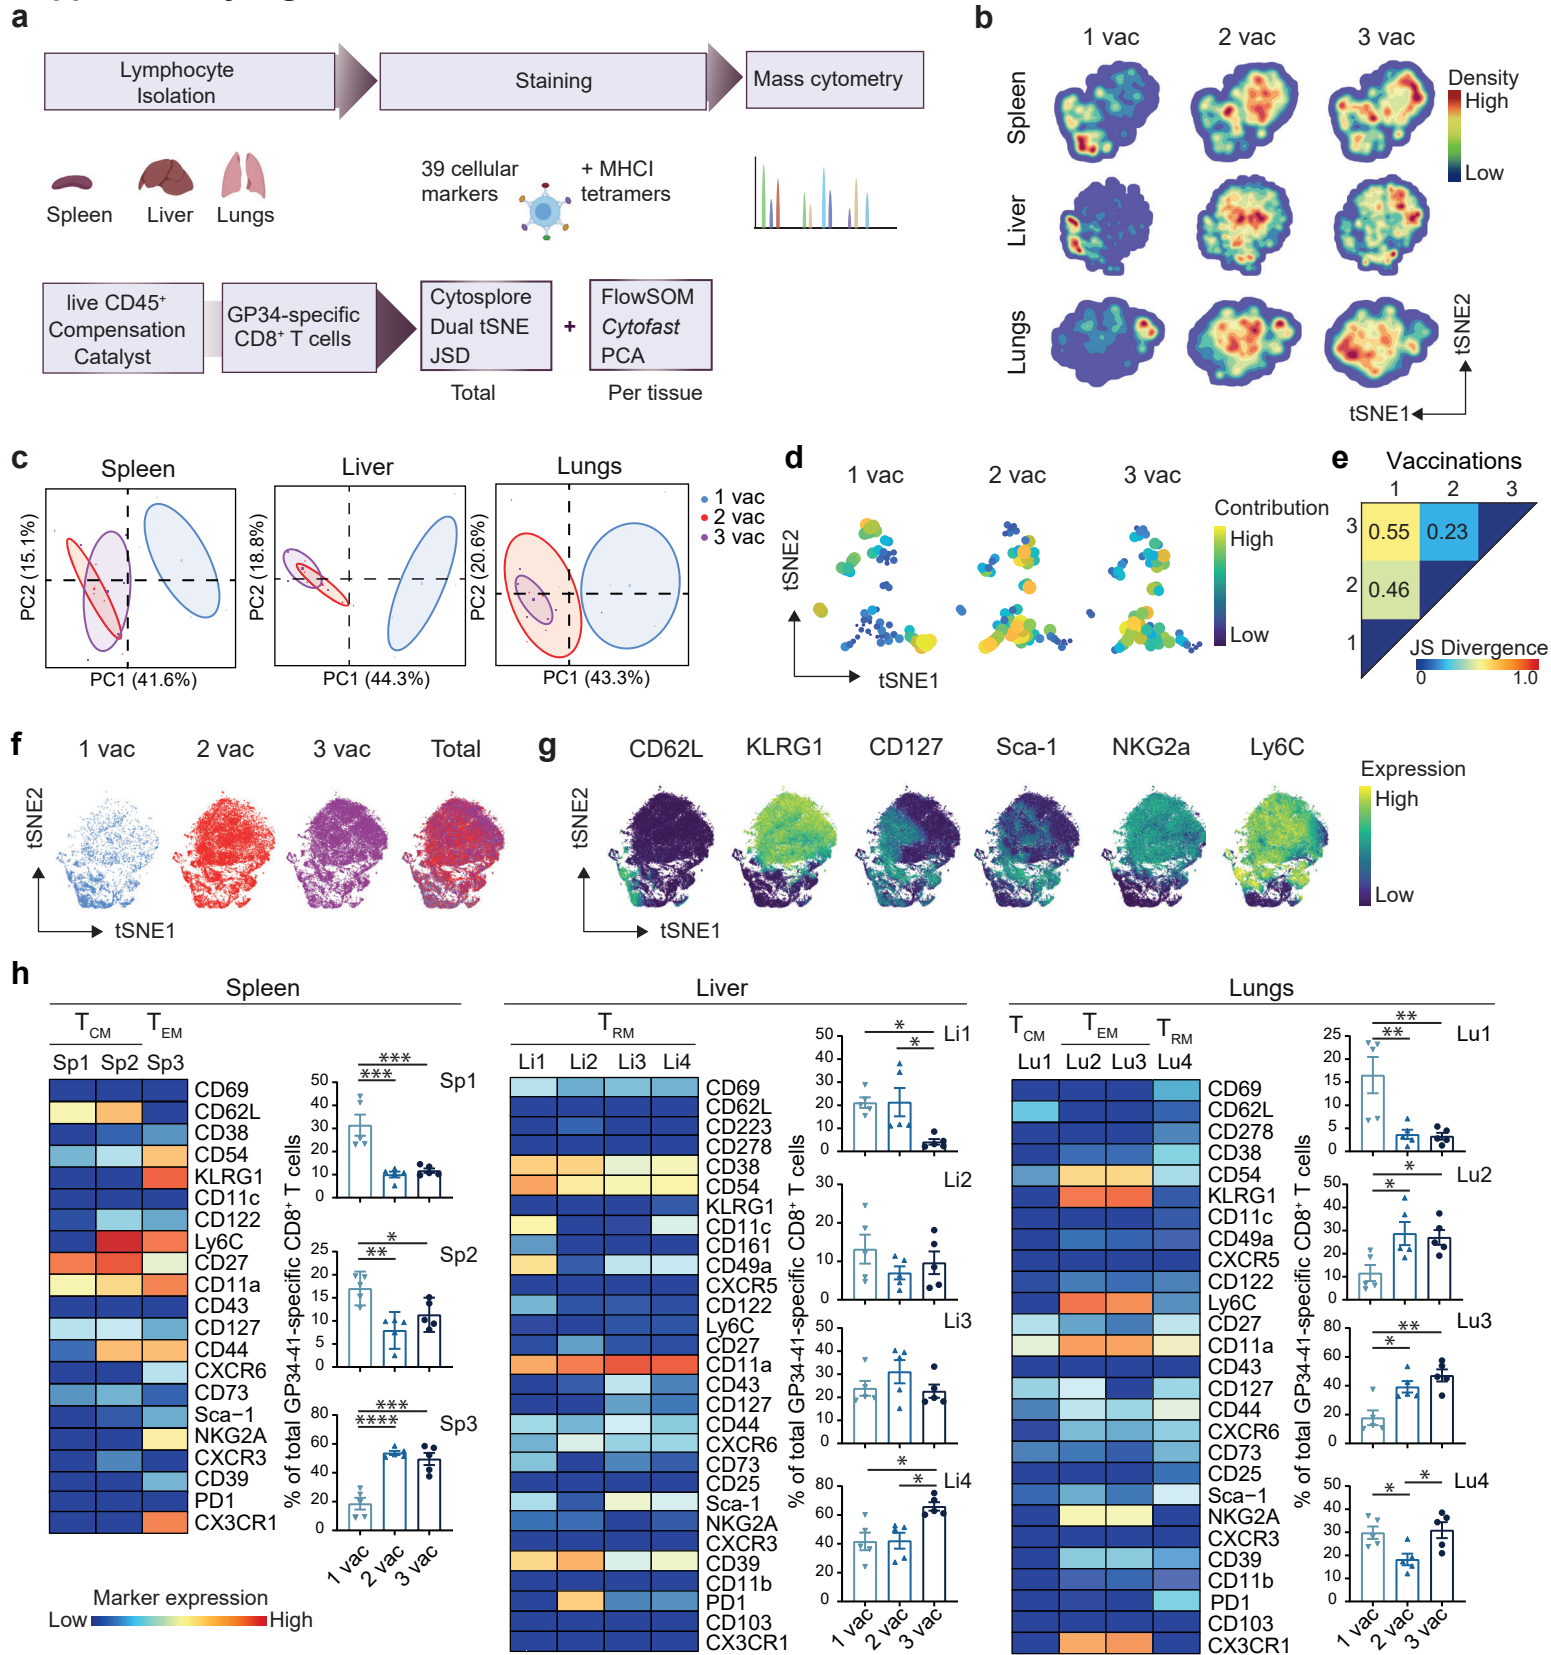

**Supplementary Figure 4. Booster vaccination impacts the differentiation of vaccine-specific CD8<sup>+</sup> T cells system-wide.** (a) Schematic of the mass cytometric analysis of lymphocytes isolated from spleen, liver, and lungs. (b) tSNE maps describing the local probability density of GP34-41-specific CD8<sup>+</sup> T cells in spleen, liver and lungs stained at day 71 after 1, 2 and 3 vaccinations with the mass cytometry panel. (c) Principal Component Analysis illustrating the phenotypic dissimilarity of GP34-41-specific CD8<sup>+</sup> T cells per tissue upon multiple vaccinations. (d) tSNE maps showing GP34-41-specific CD8<sup>+</sup> T cell clusters per vaccination. Clusters with similar composition profiles across samples end up close together in the map. The varying dot size and color in this cluster tSNE map shows the average cluster normalized frequencies per vaccination group. (e) Pairwise Jensen-Shannon Divergence plots of the tSNE map obtained from all samples of GP34-41-specific CD8<sup>+</sup> T cells grouped by vaccinations. (f) tSNE embedding of GP34-41-specific CD8<sup>+</sup> T cells isolated from vaccinated mice and multiple tissues in one analysis. Cells are color coded per vaccination. (g) Expression intensity of the cell-surface markers on the GP34-41-specific CD8<sup>+</sup> T cells. The color of the cells indicates ArcSinh5-transformed expression values for a given marker analyzed. (h) Heat maps of GP34-41-specific CD8<sup>+</sup> T cell clusters in the spleen, liver and lungs of mice that received multiple vaccinations. Clusters were selected based on their significant difference and categorized into T<sub>CM</sub>, T<sub>EM</sub> and T<sub>RM</sub> subsets. Bar graphs indicate the average percentage (± SEM, n=5) of each cluster within the GP34-41-specific CD8<sup>+</sup> T-cell population elicited by 1, 2 and 3 vaccinations. Symbols represent individual mice. Spleen: \*P=0.0302, \*\*P=0.0014, \*\*\*P=0.0001-0.0009, \*\*\*\*P<0.0001; Liver: \*P=0.0133-0.0217; Lungs: \*P=0.0239-0.0440, \*\*P=0.0015-0.0065. One-way ANOVA with Tukey's multiple comparisons test was performed to determine statistical significance. Source data are provided as a Source Data file.

## Supplementary Figure 5

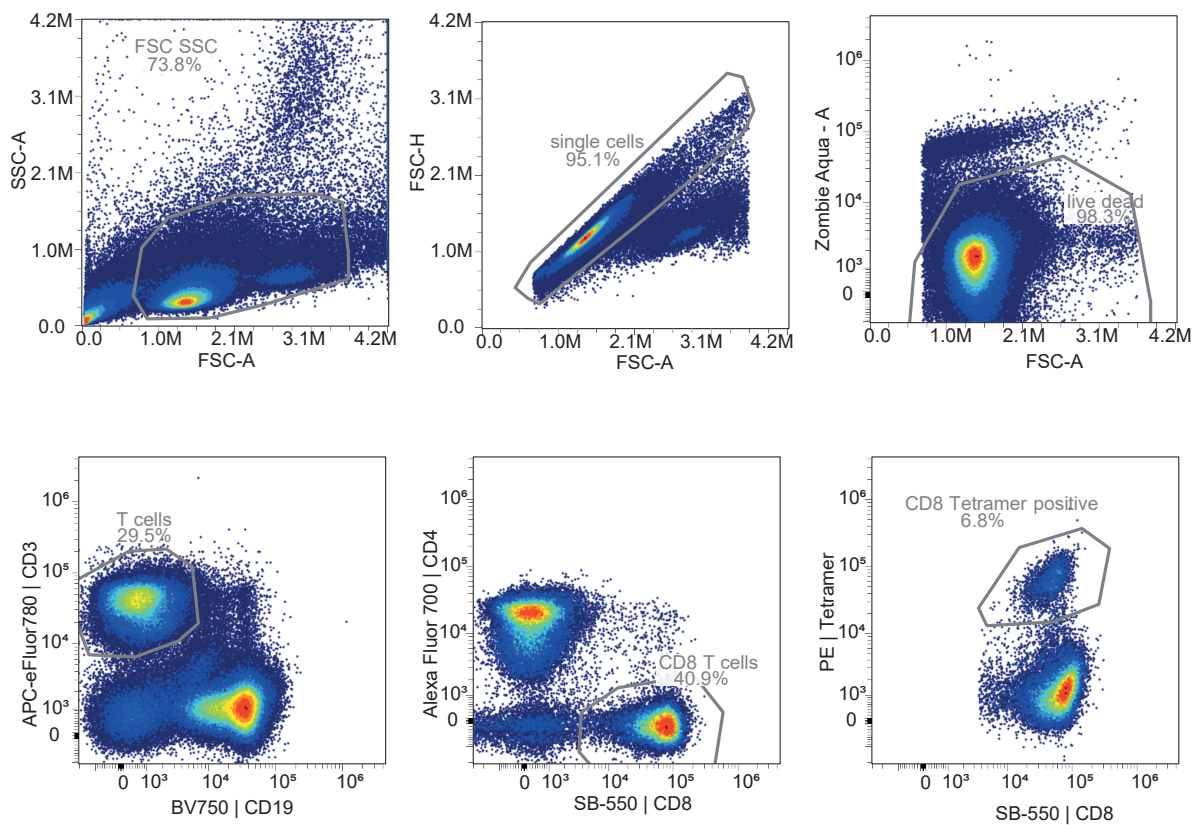

**Supplementary Figure 5. Flow cytometry gating strategies.** Representative plots show the gating strategy for detecting MHC class I tetramer positive cells depicted. In this sequential gating, cells were first gated on lymphocytes (forward-scatter (FSC-A) vs. side-scatter (SSC-A)) and then on singlets (FSC-A vs. FSC-H). The cells were next analysed for their uptake of Zombie Aqua to exclude dead cells, followed by their expression of CD3 and CD8. Finally, MHC class I tetramer positive cells were gated on the live CD3<sup>+</sup>CD8<sup>+</sup> T-cell population.

**Table S1. Synthetic long peptides**

X = cyclohexylalanine, u = d-Ala, B = amide

|                                 |                                   |
|---------------------------------|-----------------------------------|
| PADRE                           | AKXVAAWTLKAuB                     |
| Spike <sub>553-570</sub>        | TESNKKFLPFQQFGRDIA                |
| Spike <sub>553-570</sub> -PADRE | TESNKKFLPFQQFGRDIAAKXVAAWTLKAuB   |
| PADRE-Spike <sub>553-570</sub>  | AKXVAAWTLKAuTESNKKFLPFQQFGRDIA    |
| Spike <sub>818-835</sub>        | PSKPSKRSFIEDLLFNKV                |
| Spike <sub>818-835</sub> -PADRE | PSKPSKRSFIEDLLFNKVAKXVAAWTLKAuB   |
| PADRE-Spike <sub>818-835</sub>  | AKXVAAWTLKAuPSKPSKRSFIEDLLFNKV    |
| Spike <sub>405-422</sub>        | DEVQRQIAPGQTGKIADYN               |
| Spike <sub>405-422</sub> -PADRE | DEVQRQIAPGQTGKIADYNAKXVAAWTLKAuB  |
| PADRE-Spike <sub>405-422</sub>  | AKXVAAWTLKAuDEVQRQIAPGQTGKIADYN   |
| Spike <sub>437-454</sub>        | NSNNLDSKVGGNYNLYR                 |
| Spike <sub>437-454</sub> -PADRE | NSNNLDSKVGGNYNLYRAKXVAAWTLKAuB    |
| PADRE-Spike <sub>437-454</sub>  | AKXVAAWTLKAuNSNNLDSKVGGNYNLYR     |
| Spike <sub>492-509</sub>        | LQSYGFQPTNGVGYQPYPYR              |
| Spike <sub>492-509</sub> -PADRE | LQSYGFQPTNGVGYQPYPYRAKXVAAWTLKAuB |
| PADRE-Spike <sub>492-509</sub>  | AKXVAAWTLKAuLQSYGFQPTNGVGYQPYPYR  |
| Spike <sub>539-546</sub>        | IKNQCVNFNFNGLTGTGVLTESNK          |
| GP <sub>34-41</sub>             | KAVYNFATCGIFALIS                  |
| OVA                             | SMLVLLPDEVSGLEQLESIIINFEKLTWTS    |

**Table S2. Flow Cytometry antibodies and MHC tetramers**

| <b>Antibody</b> | <b>Fluorophore</b> | <b>Clone</b> | <b>Supplier</b> | <b>Catalogue number</b> | <b>Dilution</b> |
|-----------------|--------------------|--------------|-----------------|-------------------------|-----------------|
| CD3             | APC-eF780          | 17A2         | Thermofisher    | 47-0032-82              | 1:100           |
| CD3             | PE                 | 145-2C11     | Thermofisher    | 12-0031-83              | 1:200           |
| CD4             | FITC               | RM4-4        | Thermofisher    | 11-0043-85              | 1:400           |
| KLRG1           | PE-Cy7             | 2F1          | Thermofisher    | 25-5893-82              | 1:100           |
| KLRG1           | BV785              | 2F1          | Biolegend       | 138429                  | 1:100           |
| IFN $\gamma$    | APC                | XMG1.2       | Thermofisher    | 17-7311-82              | 1:400           |
| CD3             | BV510              | 145-2C11     | BD Biosciences  | 563024                  | 1:150           |
| CD69            | BV711              | H1.2F3       | BD Biosciences  | 104537                  | 1:100           |
| PD-1            | BUV615             | J43          | BD Biosciences  | 752299                  | 1:100           |
| TCF1            | AF647              | S33-966      | BD Biosciences  | 566693                  | 1:100           |
| CD4             | AF700              | RM4-5        | BioLegend       | 100536                  | 1:400           |
| CD8a            | BV605              | 53-6.7,      | BioLegend       | 100743                  | 1:1000          |
| CD8a            | SparkBlue550       | 53-6.7       | Biolegend       | 100779                  | 1:400           |
| CD38            | PE                 | 90           | Thermofisher    | 12-0381-81              | 1:200           |
| CD44            | BV786              | IM7          | BioLegend       | 103059                  | 1:100           |
| CD44            | PacB               | IM7          | Biolegend       | 103019                  | 1:200           |
| CD44            | APC-Cy7            | IM7          | BD Biosciences  | 560568                  | 1:600           |
| CD62L           | BV421              | MEL-14       | BioLegend       | 104435                  | 1:300           |
| CD62L           | BUV395             | MEL-14       | BD Biosciences  | 740218                  | 1:1600          |
| CD62L           | BV510              | MEL-14       | Biolegend       | 104441                  | 1:800           |
| CX3CR1          | BV785              | SA011F11     | BioLegend       | 149029                  | 1:1600          |
| Ly6C            | FITC               | HK1.4        | BioLegend       | 128006                  | 1:50            |
| Ly6C            | PacB               | HK1.4        | Biolegend       | 128013                  | 1:600           |
| TNF             | FITC               | MP6-XT22     | BioLegend       | 506304                  | 1:1000          |



|                                                                |                    |                |                            |                 |       |
|----------------------------------------------------------------|--------------------|----------------|----------------------------|-----------------|-------|
| Ki-67                                                          | BV605              | 16A8           | BioLegend                  | 652413          | 1:800 |
| CXCR3                                                          | BV650              | CXCR3-173      | BioLegend                  | 126531          | 1:150 |
| CD19                                                           | BV750              | 6D5            | BioLegend                  | 115561          | 1:300 |
| CD43                                                           | PerCP-Cy5.5        | 1B11           | BioLegend                  | 121223          | 1:200 |
| Zombie Aqua                                                    | BV510              | -              | BioLegend                  | 423101          | 1:800 |
| Eomes                                                          | PE-Cy7             | Dan11mag       | Invitrogen                 | 25-4875-82      | 1:100 |
| CD3                                                            | FITC               | 145-2C11       | Thermofisher               | 11-0031-85      | 1:100 |
| IL-2                                                           | PE                 | JES6-5H4       | Thermofisher               | 12-7021-82      | 1:200 |
|                                                                |                    |                |                            |                 |       |
| <b>MHC Tetramer</b>                                            | <b>Fluorophore</b> | <b>Peptide</b> | <b>Supplier</b>            | <b>Dilution</b> |       |
| MHC class I H2-Kb tetramer SARS-CoV-2 Spike <sub>539-546</sub> | APC                | VNFNFNGL       | LUMC Tetramer Facility     | 1:100           |       |
| MHC class I H2-Kb tetramer LCMV GP <sub>34-41</sub>            | PE                 | AVYNFATC       | LUMC Tetramer Facility     | 1:200           |       |
| MHC class I H2-Kb tetramer Ovalbumin OVA <sub>257-264</sub>    | APC                | SIINFEKL       | LUMC Tetramer Facility     | 1:400           |       |
| MHC class II I-A(b) tetramer PADRE                             | PE                 | AKFVAAWTLKAA   | NIH Tetramer Core Facility | 1:200           |       |

**Table S3. CyTOF Mass Cytometry Panel.** Anti-mouse monoclonal antibodies used for staining of cells for mass cytometry analysis. Antibodies were either purchased pre-conjugated, or antibodies were conjugated to the indicated lanthanide metal isotopes.

| Antibody | Clone      | Metal                  | Pre-conjugated | Company        | Cat no     | Cat no metal (Fluidigm) |
|----------|------------|------------------------|----------------|----------------|------------|-------------------------|
| Anti-PE  | PE001      | 165 Ho                 | x              | Fluidigm       | 3165015B   |                         |
| Anti-APC | APC003     | 176 Yb                 | x              | Fluidigm       | 3176007B   |                         |
| CD3e     | 145-2C11   | 172 Yb                 |                | eBioscience    | 14-0031-86 | 201172A                 |
| CD4      | RM4-5      | 145 Nd                 | x              | Fluidigm       | 3145002B   |                         |
| CD8a     | 53-6.7     | 168 Er                 | x              | Fluidigm       | 3168003B   |                         |
| CD8b     | YTS156.7.7 | 194 Pt                 |                | BioLegend      | 126602     | 201194                  |
| CD11a    | M17/4      | 160 Gd                 |                | eBioscience    | 16-0111-82 | 201160A                 |
| CD11b    | M1/70      | 154 Sm                 | x              | Fluidigm       | 3154006B   |                         |
| CD11c    | N418       | 167 Er                 |                | eBioscience    | 14-0114-85 | 201167A                 |
| CD19     | 6D5        | Qdot655:<br>112/114 Cd | x              | ThermoFisher   | Q10379     |                         |
| CD25     | 3C7        | 150 Nd                 | x              | Fluidigm       | 3150002B   |                         |
| CD27     | LG.3A10    | 158 Gd                 |                | eBioscience    | 14-0272-82 | 201158A                 |
| CD38     | 90         | 163 Dy                 |                | eBioscience    | 14-0381-85 | 201163A                 |
| CD39     | 24DMS1     | 152 Sm                 |                | eBioscience    | 14-0391-82 | 201152A                 |
| CD43     | 1B11       | 115 In                 |                | BioLegend      | 121202     |                         |
| CD44     | IM7        | 142 Nd                 |                | eBioscience    | 14-0441-86 | 201142A                 |
| CD45     | 30-F11     | 89Y                    | x              | Fluidigm       | 3089005B   |                         |
| CD49a    | Ha31/8     | 151 Eu                 |                | BD Biosciences | 555001     | 201151A                 |
| CD54     | YN1/1.7.4  | 164 Dy                 |                | BioLegend      | 116102     | 201164A                 |
| CD62L    | MEL-14     | 169 Tm                 |                | BioLegend      | 104443     | 201169A                 |
| CD69     | H1.2F3     | 143 Nd                 | x              | Fluidigm       | 3143004B   |                         |
| CD73     | TY/23      | 148 Nd                 |                | BD Biosciences | 550738     | 201148A                 |
| CD86     | GL1        | 171 Yb                 |                | eBioscience    | 14-0862-85 | 201171A                 |
| CD103    | 2.E7       | 173 Yb                 |                | eBioscience    | 14-1031-85 | 201173A                 |
| CD122    | TM-b1      | 155 Gd                 |                | eBioscience    | 14-1222-85 | 201155A                 |
| CD127    | A7R34      | 175 Lu                 | x              | Fluidigm       | 3175006B   |                         |
| CD160    | 7H1        | 209 Bi                 |                | BioLegend      | 143002     |                         |
| CD161    | PK136      | 170 Er                 | x              | Fluidigm       | 3170002B   |                         |
| CD223    | eBioC9B7W  | 161 Dy                 |                | eBioscience    | 14-2231-85 | 201161A                 |
| CD278    | 7E.17G9    | 162 Dy                 |                | eBioscience    | 14-9942-85 | 201162A                 |
| CX3CR1   | SA011F11   | 174 Yb                 |                | BioLegend      | 149002     | 201174A                 |
| CXCR3    | CXCR3-173  | 149 Sm                 |                | eBioscience    | 16-1831-85 | 201149A                 |
| CXCR5    | L138D7     | 153 Eu                 |                | BioLegend      | 145502     | 201153A                 |
| CXCR6    | SA051D1    | 144 Nd                 |                | BioLegend      | 151102     | 201144A                 |
| FR4      | TH6        | 198 Pt                 |                | BioLegend      | 125102     | 201198                  |
| KLRG1    | 2F1        | 166 Er                 |                | eBioscience    | 16-5893-85 | 201166A                 |
| Ly6C     | HK1.4      | 156 Gd                 |                | eBioscience    | 16-5932-85 | 201156A                 |
| NKG2A    | 20d5       | 147 Sm                 |                | eBioscience    | 16-5896-85 | 201147A                 |
| PD-1     | 29F.1A12   | 159 Tb                 | x              | Fluidigm       | 3159024B   |                         |
| Sca-1    | D7         | 141 Pr                 |                | BioLegend      | 108135     | 201141A                 |
| TCRgd    | eBioGL3    | 146 Nd                 |                | eBioscience    | 14-5711-85 | 201146A                 |

## Supplementary Methods

### Mass cytometry and analysis.

Metal-conjugated antibodies were either purchased from Fluidigm or were generated by conjugation of lanthanide metal isotopes to anti-mouse antibodies using the Maxpar X8 Polymer method according to the manufacturer's protocol (Fluidigm). Cisplatin 194 and 198 and Bismuth 209 were conjugated to anti-mouse monoclonal antibodies using protocols previously described (1, 2). All in-house conjugated antibodies were diluted to 0.5 mg/ml in antibody stabilizer supplemented with 0.05% sodium azide (Candor Biosciences). Serial dilution staining was performed on mouse lymphocytes to determine appropriate antibody dilution.

The CyTOF staining was performed as described elsewhere (3). In brief, around  $3 \times 10^6$  cells per sample were stained for CyTOF analysis. First, cells were stained in FACS buffer with PE and APC labelled tetramers and incubated for 30 minutes on ice. Cells were washed with Maxpar Cell Staining buffer (201068, Fluidigm) and subsequently incubated for 20 minutes with 1  $\mu$ M Interchaloator-Rh (201103A, Fluidigm) in staining buffer. Next, aspecific binding was prevented by incubating cells with Fc blocking solution and mouse serum for 15 minutes. Anti-PE and anti-APC were added and incubated for 45 minutes. The antibody mix was added and incubated for an additional 45 minutes. After washing the cells, samples were incubated overnight with 25nM Interchaloator-Ir (201192A, Fluidigm) in Maxpar Fix and Perm Buffer (201067, Fluidigm). Cells were pelleted in staining buffer and measured within one week. Before measuring, EQ™ Four Element Calibration Beads (201078, Fluidigm) were added in a 1:10 ratio. Mass cytometry data analysis focused on the antigen-specific CD8<sup>+</sup> T cells. For the selection, we set our gating strategy to live single cells, positive for CD45, and excluded reference beads. The live CD45<sup>+</sup> gated files were compensated using Catalyst (4). Subsequently, MHC class I tetramer-specific CD8<sup>+</sup> T cells were selected in FlowJo for subsequent analysis. Next, marker expression was ArcSinh5 transformed and subjected to dimensionality reduction analyses and cluster identification using Cytosplore (5) or FlowSOM (6). For Cytosplore analysis, samples were analysed by hierarchical stochastic neighbor embedding (HSNE) (7) based on approximated t-distributed stochastic neighbor embedding (A-tSNE) (8). The similarity between tSNE maps was quantified using the Jensen-Shannon (JS) divergence as previously described (3). The JS divergence values ranged from 0 (indicating identical distributions) to 1 (indicating disjoint distributions). The dual tSNE analysis was performed to quantify the individual samples similarity based on the clusters composition as previously described (3, 9). FlowSOM was used for the identification of vaccination and tissue-specific clusters. Using FlowSOM, 14 clusters were identified per analysis. Subsequently, Cytofast (10, 11) was used for visualization and quantification of cell clusters. T<sub>RM</sub> (CD62L<sup>-</sup> CD69<sup>+</sup>), T<sub>CM</sub> (CD62L<sup>+</sup> CD69<sup>-</sup>) and T<sub>EM</sub> (CD62L<sup>-</sup> CD69<sup>-</sup>) CD8<sup>+</sup> T cell clusters were selected by expression of CD62L and CD69. Visualization of heatmaps and selection of clusters based on the size of the cluster (abundance of at least >5% of total) and significance was performed as previously described (3).

## Supplementary References

1. Mei HE, Leipold MD, Maecker HT. Platinum-conjugated antibodies for application in mass cytometry. *Cytometry A*. 2016;89(3):292-300.
2. Spitzer MH, Carmi Y, Reticker-Flynn NE, Kwek SS, Madhiredy D, Martins MM, et al. Systemic Immunity Is Required for Effective Cancer Immunotherapy. *Cell*. 2017;168(3):487-502.e15.
3. van der Gracht ETI, Beyrend G, Abdelaal T, Pardieck IN, Wesselink TH, van Haften FJ, et al. Memory CD8+ T cell heterogeneity is primarily driven by pathogen-specific cues and additionally shaped by the tissue environment. *iScience*. 2021;24(1):101954.
4. Chevrier S, Crowell HL, Zanotelli VRT, Engler S, Robinson MD, Bodenmiller B. Compensation of Signal Spillover in Suspension and Imaging Mass Cytometry. *Cell Systems*. 2018;6(5):612-20.e5.
5. Höllt T, Pezzotti N, van Unen V, Koning F, Eisemann E, Lelieveldt B, et al. Cytosplore: Interactive Immune Cell Phenotyping for Large Single-Cell Datasets. *Computer Graphics Forum*. 2016;35(3):171-80.
6. Van Gassen S, Callebaut B, Van Helden MJ, Lambrecht BN, Demeester P, Dhaene T, et al. FlowSOM: Using self-organizing maps for visualization and interpretation of cytometry data. *Cytometry A*. 2015;87(7):636-45.
7. van Unen V, Höllt T, Pezzotti N, Li N, Reinders MJT, Eisemann E, et al. Visual analysis of mass cytometry data by hierarchical stochastic neighbour embedding reveals rare cell types. *Nature Communications*. 2017;8(1):1740.
8. Pezzotti N, Lelieveldt BPF, Van Der Maaten L, Holtt T, Eisemann E, Vilanova A. Approximated and User Steerable tSNE for Progressive Visual Analytics. *IEEE Trans Vis Comput Graph*. 2017;23(7):1739-52.
9. van Unen V, Li N, Molendijk I, Temurhan M, Holtt T, van der Meulen-de Jong AE, et al. Mass Cytometry of the Human Mucosal Immune System Identifies Tissue- and Disease-Associated Immune Subsets. *Immunity*. 2016;44(5):1227-39.
10. Beyrend G, Stam K, Holtt T, Ossendorp F, Arens R. Cytofast: A workflow for visual and quantitative analysis of flow and mass cytometry data to discover immune signatures and correlations. *Comput Struct Biotechnol J*. 2018;16:435-42.
11. Beyrend G, Stam K, Ossendorp F, Arens R. Visualization and Quantification of High-Dimensional Cytometry Data using Cytofast and the Upstream Clustering Methods FlowSOM and Cytosplore. *J Vis Exp*. 2019(154).
